# Supplementary material for: 1,3,4,6,7,9-Hexamethylbenzo[1,2-c:3,4-c′:5,6-c′′]trithiophene: a twisted heteroarene
Source: Royal Society of Chemistry journal article supplement (doi:10.1039/b902517k), 2009-01-01
Supplement: b902517k.pdf [file b902517k.pdf]

**Supporting Information**  
**for**  
**1,3,4,6,7,9-Hexamethylbenzo[1,2-*c*:3,4-*c'*:5,6-*c''*]trithiophene:**  
**A Twisted Heteroarene**

Yao-Ting Wu,<sup>\*,a</sup> Chia-Cheng Tai,<sup>a</sup> Wei-Chih Lin,<sup>a</sup> Kim K. Baldrige<sup>\*,b</sup>

<sup>a</sup>Department of Chemistry, National Cheng Kung University, No.1 Ta-Hsueh Road, Tainan,  
Taiwan.

<sup>b</sup>Institute of Organic Chemistry, University of Zurich, Winterthurerstrasse 190, CH-8057  
Zurich, Switzerland

E-mail: ytwuchem@mail.ncku.edu.tw; kimb@oci.unizh.

**Index**

| <b>A.</b> | <b>NMR Spectra</b>                                                                                                                                  | Page |
|-----------|-----------------------------------------------------------------------------------------------------------------------------------------------------|------|
|           | <sup>1</sup> H- and <sup>13</sup> C-NMR Spectra of benzo[1,2- <i>c</i> :3,4- <i>c'</i> :5,6- <i>c''</i> ]trithiophene (C-H)                         | S2   |
|           | <sup>1</sup> H- and <sup>13</sup> C-NMR Spectra of 1,3,4,6,7,9-Hexamethylbenzo[1,2- <i>c</i> :3,4- <i>c'</i> :5,6- <i>c''</i> ]-trithiophene (C-Me) | S3   |
| <b>B.</b> | <b>Table S1</b>                                                                                                                                     | S4   |
|           | (Calculated and experimental physical properties of compounds C-Me and C-H)                                                                         |      |
| <b>C.</b> | <b>Computational Results</b>                                                                                                                        | S5   |

# A. NMR Spectra

## <sup>1</sup>H- and <sup>13</sup>C-NMR Spectra of benzo[1,2-*c*:3,4-*c'*:5,6-*c''*]trithiophene (C-H)

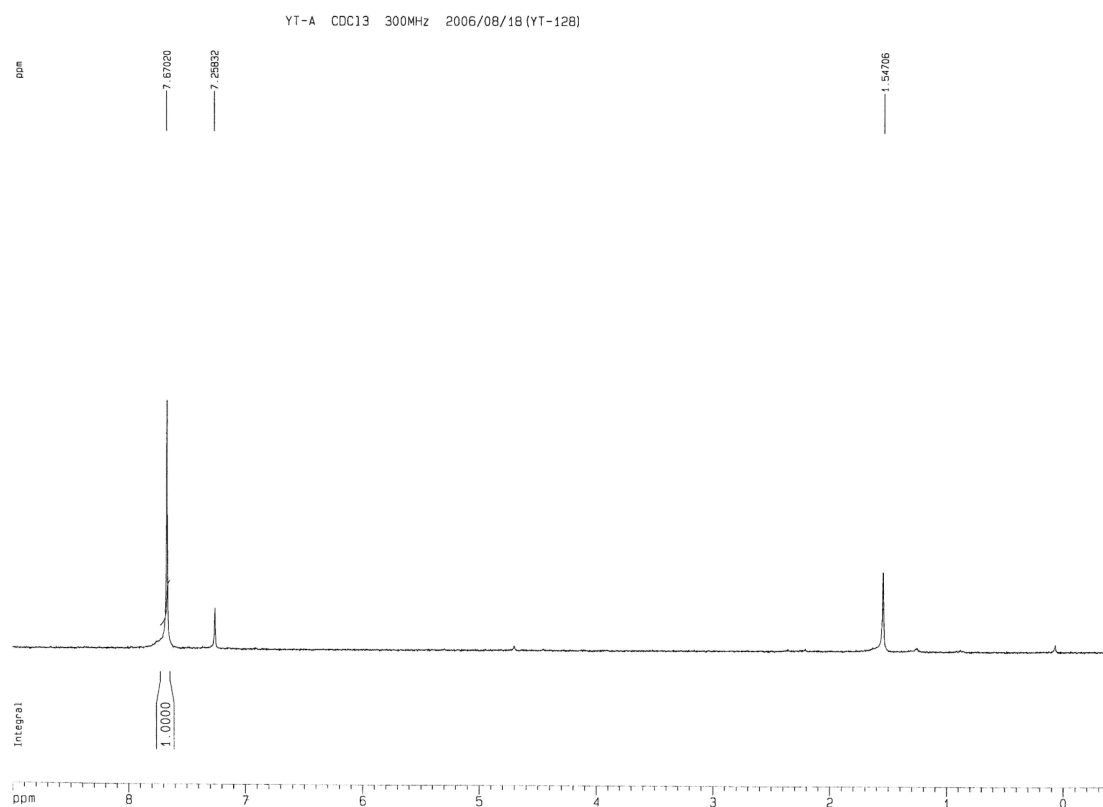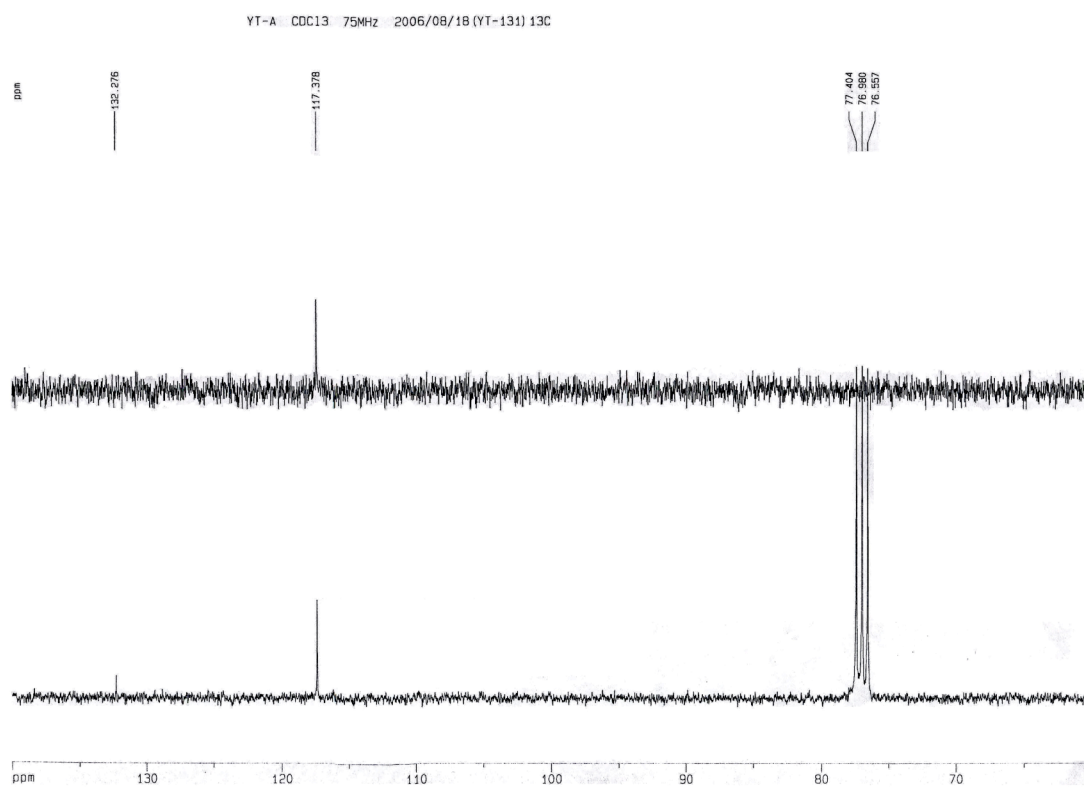

<sup>1</sup>H- and <sup>13</sup>C-NMR Spectra of 1,3,4,6,7,9-Hexamethylbenzo[1,2-c:3,4-c':5,6-c'']trithiophene (C-Me)

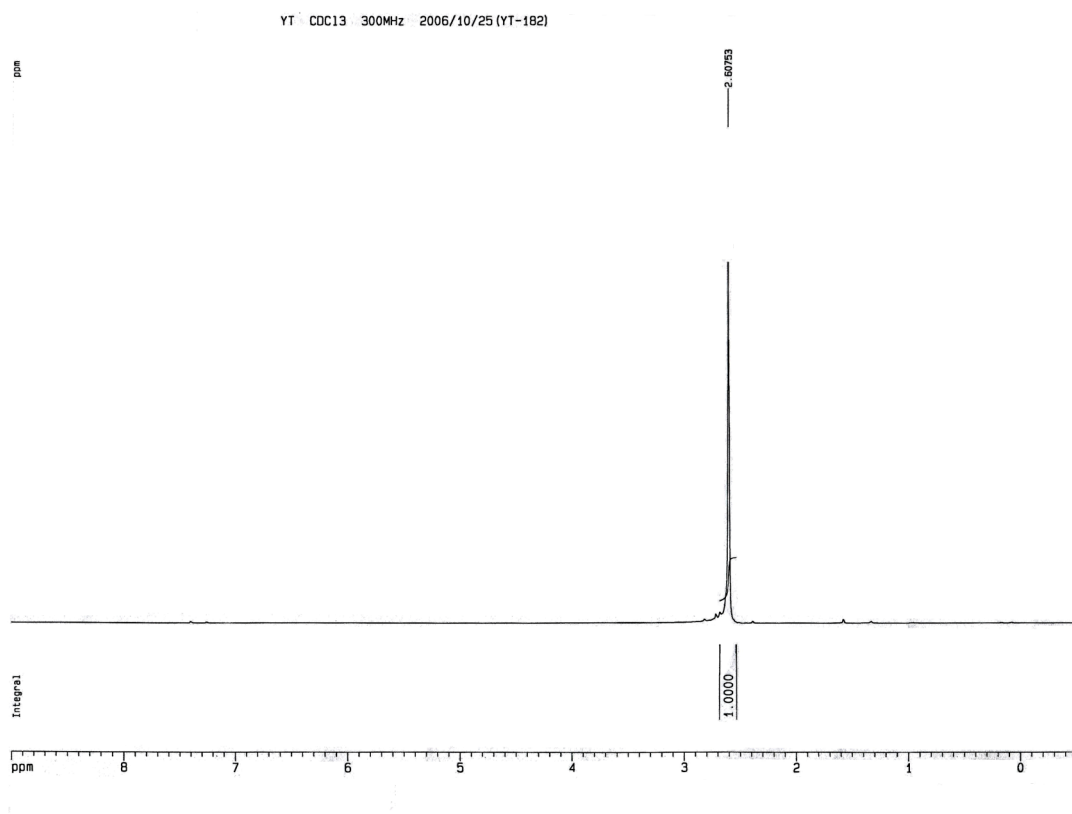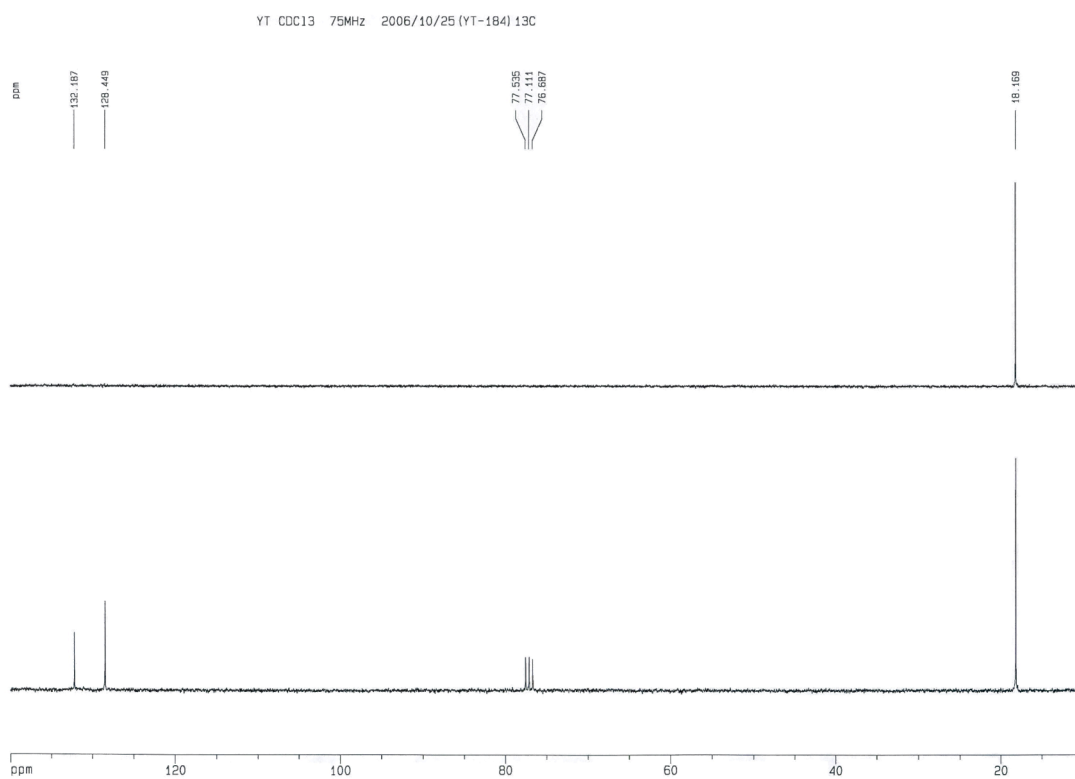

**Table S1.** Calculated and experimental physical properties of compounds C-Me and C-H.

| Compound                              |                   | C-Me                                                                | C-H                                                                                    |
|---------------------------------------|-------------------|---------------------------------------------------------------------|----------------------------------------------------------------------------------------|
| UV, $\lambda_{\max}$ (nm)             | Exp.              | 264 (4.91), <sup>a</sup> 316 (4.08)                                 | 248 (4.88), <sup>a</sup> 257 (4.92), 279 (4.30),<br>295 (4.07), 307 (4.16), 320 (4.03) |
|                                       | Cal. <sup>b</sup> | 266.7, 274.2, 274.8, 283.1,<br>293.7, 299.4, 312.4, 317.8,<br>321.7 | 256.5, 264.9, 295.9, 309.0                                                             |
| <sup>1</sup> H NMR (ppm)              | Exp.              | 2.61                                                                | 7.67                                                                                   |
|                                       | Cal.              | 2.45                                                                | —                                                                                      |
| <sup>13</sup> C NMR (ppm)             | Exp.              | 18.2, 128.4, 132.2                                                  | 117.4, 132.3                                                                           |
|                                       | Cal.              | 22.3, 129.9, 135.5                                                  | —                                                                                      |
| Ox. Potential,<br>$E_{\text{pa}}$ (V) | Exp.              | 0.79, 1.10                                                          | 0.84, 1.27                                                                             |
| HOMO (eV)                             | Cal. <sup>b</sup> | -5.36                                                               | -5.93                                                                                  |
|                                       | Exp. <sup>c</sup> | -5.38                                                               | -5.55                                                                                  |
| LUMO (eV)                             | Cal. <sup>b</sup> | -0.87                                                               | -1.35                                                                                  |
| Koopmans                              | Cal. <sup>b</sup> | -5.36                                                               | -5.93                                                                                  |
| $\Delta\text{SCF}$ (eV)               | Cal. <sup>b</sup> | -6.77                                                               | -7.47                                                                                  |

<sup>a</sup>  $\lg\epsilon$  ( $\text{M}^{-1}\text{cm}^{-1}$ ). <sup>b</sup>B3PW91/DZ+(2d,p). <sup>c</sup>  $E_{\text{HOMO}} = -E_{\text{onset}} - 4.8$ .

## Computational Results:

M06-2X/D95(2d,p)

| Molecule     | <i>Exo</i> | <i>Endo</i> | $\Delta(\text{Exo-Endo})$ | Symmetry     | Character |
|--------------|------------|-------------|---------------------------|--------------|-----------|
| <b>D</b>     | 1.4203     | 1.3988      | 0.02                      | Flat/D3H     | PD        |
| <b>C-H</b>   | 1.4589     | 1.4389      | 0.02                      | Flat/D3H     | PD        |
| <b>B-F</b>   | 1.469      | 1.418       | 0.05                      | Nonplanar/C2 | PD        |
| <b>B-F</b>   | 1.4608     | 1.4181      | 0.04                      | Nonplanar/D3 | PD        |
| Triphenylene | 1.4641     | 1.4106      | 0.05                      | Flat/D3H     | PD        |
| <b>B-Me</b>  | 1.4768     | 1.4235      | 0.05                      | Nonplanar/C2 | PD        |
| <b>B-Me</b>  | 1.4691     | 1.4191      | 0.05                      | Nonplanar/D3 | PD        |
| <b>C-Me</b>  | 1.4686     | 1.4508      | 0.02                      | Nonplanar/C2 | PD        |
| <b>C-Me</b>  | 1.4642     | 1.4516      | 0.01                      | Nonplanar/D3 | PD        |
| <b>C-Me</b>  | 1.4608     | 1.4508      | 0.01                      | Nonplanar/C1 | PD        |

Compound C-H looks essentially like 3 independent thiophenes, whereas, compound 10 looks like an aromatic central ring and isolated double bonds in the flanking rings. The former is more radialene-like. As such, the latter is more stable by 9.2 kcal/mol.

| Molecule                     | E+ZPE        | $\Delta(\text{Energy})$ | Symmetry                     | Character |
|------------------------------|--------------|-------------------------|------------------------------|-----------|
| <b>D</b>                     | -1655.143889 | 0.0                     | Flat/D3H                     | PD        |
| <b>D</b><br>np_opt           | No change    |                         | Flat/d3h=C2                  | PD        |
| <b>C-H</b>                   | -1655.129201 | 9.22                    | Flat/D3H                     | PD        |
| <b>C-H</b><br>at C-Me C2,opt | No change    |                         | Flat/d3h=C2                  |           |
| <b>B-F</b>                   | -1883.628061 | 26.96                   | Flat/D3H                     | MNE       |
| <b>B-F</b>                   | -1883.671017 | 0.0                     | Nonplanar/C2                 | PD        |
| <b>B-F</b>                   | -1883.663274 | 4.86                    | Nonplanar/D3                 | PD        |
| <b>B-F</b>                   | -1883.628057 | 26.96                   | Nonplanar/Cs                 | MNE       |
| Triphenylene                 | -692.761130  | --                      | Flat/D3H                     | PD        |
| Triphenylene<br>np_opt       | No change    |                         |                              |           |
| <b>B-Me</b>                  | -928.361084  | 0.0                     | Nonplanar/C2                 | PD        |
| <b>B-Me</b>                  | -928.354067  | 4.40                    | Nonplanar/D3                 | PD        |
| <b>B-Me</b>                  | -928.338703  | 14.04                   | Nonplanar/CsTS               | MNE       |
| <b>C-Me</b>                  | -1890.758203 | 0.0                     | Nonplanar/C2 →<br>same as C1 | PD        |
| <b>C-Me</b>                  | -1890.748970 | 6.4                     | Nonplanar/D3                 | PD        |
| <b>C-Me</b>                  | -1890.755192 | --                      | Nonplanar/Cs                 | 2NE       |
| <b>C-Me</b>                  | -1890.742735 | --                      | Nonplanar/Cs                 | 3NE       |
| <b>C-Me</b>                  | -1890.759193 | 0.0                     | Nonplanar/C1 →<br>same as C2 | PD        |
| <b>C-Me</b>                  | -1890.744274 | --                      | Nonplanar/C2                 | 2NE       |
| <b>C-Me</b><br>C2 to D3 TS   | -1890.747569 | 7.3                     | Nonplanar/C2                 | 1NE       |
| <b>C-Me</b><br>C2 to C2 TS   | -1890.754415 | 3.0                     | Nonplanar/C1                 | 1NE       |

'np' == nonplanar

M06-2X/DZ(2d,op) structures

**D** structure:

|   |               |               |    |
|---|---------------|---------------|----|
| C | 1.2316074111  | -0.6575914661 | 0. |
| C | -0.0463036635 | 1.3953457369  | 0. |
| C | -1.2607589273 | 0.6589910741  | 0. |
| C | 0.0596277869  | -1.4213264272 | 0. |
| C | 1.2011441683  | 0.7623623465  | 0. |
| C | -1.1853059034 | -0.737804863  | 0. |
| S | 2.6336439621  | -1.6658448338 | 0. |
| S | 0.1257840378  | 3.1136800002  | 0. |
| C | -2.6141530997 | 1.1290518493  | 0. |
| C | 0.3292304899  | -2.8283799066 | 0. |
| C | 2.2848077737  | 1.6995462352  | 0. |
| S | -2.7594793945 | -1.4479549427 | 0. |
| C | 1.6656452547  | -3.0945401204 | 0. |
| C | 1.8471112056  | 2.9897023626  | 0. |
| C | -3.5128498383 | 0.1046768246  | 0. |
| H | -2.8938498529 | 2.1751581671  | 0. |
| H | -0.4368117549 | -3.593714795  | 0. |
| H | 3.3306466031  | 1.4188551553  | 0. |
| H | 2.1468501449  | -4.0617758021 | 0. |
| H | 2.4441220488  | 3.8900845735  | 0. |
| H | -4.5911084525 | 0.1714788318  | 0. |

**C-H** structure:

|   |               |               |    |
|---|---------------|---------------|----|
| C | 1.2518726435  | -0.7294293704 | 0. |
| C | 0.0057680433  | 1.4488681968  | 0. |
| C | -1.2576406798 | 0.7194388387  | 0. |
| C | 0.0057680291  | -1.4488681969 | 0. |
| C | 1.2518726506  | 0.7294293582  | 0. |
| C | -1.2576406868 | -0.7194388264 | 0. |
| C | 2.3325874987  | -1.5748649555 | 0. |
| C | 0.1975793096  | 2.8075125081  | 0. |
| C | -2.5301667963 | 1.2326475774  | 0. |
| C | 0.1975792821  | -2.8075125101 | 0. |
| C | 2.3325875141  | 1.5748649326  | 0. |
| C | -2.5301668083 | -1.2326475527 | 0. |
| S | 1.8557939946  | -3.2143295234 | 0. |
| S | 1.8557940261  | 3.2143295052  | 0. |
| S | -3.7115880207 | 0.0000000182  | 0. |
| H | 3.3809943637  | -1.3170910612 | 0. |
| H | -0.5498628638 | 3.5865725397  | 0. |
| H | -2.8311314778 | 2.2694815062  | 0. |
| H | -0.5498628989 | -3.5865725343 | 0. |
| H | 3.3809943766  | 1.3170910281  | 0. |
| H | -2.8311315    | -2.2694814785 | 0. |

C-H (nonplanar = C2)

|   |               |               |               |
|---|---------------|---------------|---------------|
| C | 0.0951231433  | -0.723141753  | 1.2607557507  |
| C | -0.1886634648 | 1.4365701864  | 0.0144772486  |
| C | -0.0935677203 | 0.7133977877  | -1.2488433108 |
| C | 0.1886634648  | -1.4365701864 | 0.0144772485  |
| C | -0.0951231433 | 0.7231417529  | 1.2607557508  |
| C | 0.0935677202  | -0.7133977876 | -1.2488433109 |
| S | 0.4188426031  | -3.1869365311 | 1.864597048   |
| S | -0.4188426031 | 3.186936531   | 1.8645970482  |
| S | 0             | 0.0000000002  | -3.7028175837 |
| C | 0.2052243979  | -1.5612527785 | 2.341545338   |
| C | -0.3658505422 | 2.7835869124  | 0.2061374981  |
| C | -0.1602374641 | 1.2223810138  | -2.5212612074 |
| C | 0.3658505422  | -2.7835869124 | 0.2061374979  |
| C | -0.2052243979 | 1.5612527783  | 2.3415453381  |
| C | 0.1602374641  | -1.2223810136 | -2.5212612075 |
| H | 0.1716366924  | -1.3053928838 | 3.3899748797  |
| H | -0.4673312003 | 3.5558403343  | -0.5414117406 |
| H | -0.2950433322 | 2.2505433509  | -2.8218544252 |
| H | 0.4673312003  | -3.5558403342 | -0.5414117409 |
| H | -0.1716366924 | 1.3053928835  | 3.3899748798  |
| H | 0.2950433321  | -2.2505433507 | -2.8218544254 |

**B-F structure (D3H):**

|   |               |               |    |
|---|---------------|---------------|----|
| C | 0.7242590271  | 1.2810712663  | 0. |
| C | 0.7473107471  | -1.2677623495 | 0. |
| C | -0.7473107465 | -1.2677623499 | 0. |
| C | -0.7242590277 | 1.2810712659  | 0. |
| C | 1.4715697742  | -0.013308916  | 0. |
| C | -1.4715697742 | -0.0133089168 | 0. |
| C | 1.3568987222  | 2.5466851299  | 0. |
| C | 1.5270446569  | -2.4484513287 | 0. |
| C | -1.5270446556 | -2.4484513295 | 0. |
| C | -1.3568987235 | 2.5466851292  | 0. |
| C | 2.8839433791  | -0.0982337997 | 0. |
| C | -2.883943379  | -0.0982338012 | 0. |
| C | 0.6810661505  | 3.7530328796  | 0. |
| C | 2.9096887397  | -2.4663370277 | 0. |
| C | -2.9096887384 | -2.4663370292 | 0. |
| C | -0.6810661524 | 3.7530328792  | 0. |
| C | 3.5907548908  | -1.28669585   | 0. |
| C | -3.5907548902 | -1.2866958518 | 0. |
| F | 1.3586726724  | 4.8860326938  | 0. |
| F | 3.5520921004  | -3.6196613966 | 0. |
| F | -3.5520920985 | -3.6196613984 | 0. |
| F | -1.3586726749 | 4.8860326931  | 0. |
| F | 4.9107647734  | -1.2663712947 | 0. |
| F | -4.9107647727 | -1.2663712972 | 0. |
| F | 2.660152161   | 2.7794967855  | 0. |
| F | 1.0770387454  | -3.6935077421 | 0. |
| F | -1.0770387436 | -3.6935077427 | 0. |
| F | -2.6601521624 | 2.7794967841  | 0. |
| F | 3.737190906   | 0.9140109585  | 0. |
| F | -3.7371909065 | 0.9140109566  | 0. |



### B-F structure (D3)

|   |               |               |               |
|---|---------------|---------------|---------------|
| C | -1.2500815484 | -0.7076786997 | 0.0495179973  |
| C | 1.2379085058  | -0.7287630278 | 0.0495179973  |
| C | 0.0121730425  | -1.4364417275 | -0.0495179973 |
| C | 1.2379085058  | 0.7287630278  | -0.0495179973 |
| C | -1.2500815484 | 0.7076786997  | -0.0495179973 |
| C | 0.0121730425  | 1.4364417275  | 0.0495179973  |
| C | -2.4778947715 | -1.3420450264 | 0.3017746811  |
| C | 2.4011924716  | -1.4748973068 | 0.3017746811  |
| C | 0.0767022998  | -2.8169423332 | -0.3017746811 |
| C | 2.4011924716  | 1.4748973068  | -0.3017746811 |
| C | -2.4778947715 | 1.3420450264  | -0.3017746811 |
| C | 0.0767022998  | 2.8169423332  | 0.3017746811  |
| C | -3.6780187169 | -0.6682562257 | 0.1850992729  |
| C | 2.4177362262  | -2.8511295316 | 0.1850992729  |
| C | 1.2602824907  | -3.5193857573 | -0.1850992729 |
| C | 2.4177362262  | 2.8511295316  | -0.1850992729 |
| C | -3.6780187169 | 0.6682562257  | -0.1850992729 |
| C | 1.2602824907  | 3.5193857573  | 0.1850992729  |
| F | -2.547752295  | 2.5914295748  | -0.7426162578 |
| F | -0.9703676965 | -3.5021329974 | -0.7426162578 |
| F | 3.5181199914  | -0.9107034226 | 0.7426162578  |
| F | -0.9703676964 | 3.5021329974  | 0.7426162578  |
| F | -2.547752295  | -2.5914295748 | 0.7426162578  |
| F | 3.5181199914  | 0.9107034226  | -0.7426162578 |
| F | -4.8210922304 | -1.293371469  | 0.4100759535  |
| F | 3.5306386639  | -3.5285026111 | 0.4100759535  |
| F | 1.2904535665  | -4.82187408   | -0.4100759535 |
| F | 3.5306386639  | 3.528502611   | -0.4100759535 |
| F | -4.8210922304 | 1.293371469   | -0.4100759535 |
| F | 1.2904535666  | 4.82187408    | 0.4100759535  |

**B-F structure (C2)**

|   |               |               |               |
|---|---------------|---------------|---------------|
| C | -0.7257433075 | 0.0827340849  | 1.2707028775  |
| C | 0.7257433075  | -0.0827340849 | 1.2707028775  |
| C | -1.4315913399 | -0.1127730066 | 0.0567105768  |
| C | 1.4315913399  | 0.1127730066  | 0.0567105768  |
| C | -0.6696622994 | -0.2392036365 | -1.1931898342 |
| C | 0.6696622994  | 0.2392036365  | -1.1931898342 |
| C | -2.8112310616 | 0.1163409478  | 0.0618735004  |
| C | 2.8112310616  | -0.1163409478 | 0.0618735005  |
| C | -1.4149192895 | 0.5252747087  | 2.3994632929  |
| C | 1.4149192895  | -0.5252747087 | 2.3994632929  |
| C | -2.7925716164 | 0.6625694798  | 2.3972464124  |
| C | 2.7925716164  | -0.6625694798 | 2.3972464124  |
| C | -3.4922380533 | 0.4473055321  | 1.2230957955  |
| C | 3.4922380533  | -0.4473055321 | 1.2230957955  |
| C | -0.5944232331 | -0.3559426317 | -3.6119482398 |
| C | 0.5944232331  | 0.3559426317  | -3.6119482398 |
| C | -1.2209697363 | -0.6471821803 | -2.4098102783 |
| C | 1.2209697363  | 0.6471821803  | -2.4098102783 |
| F | -3.5300621965 | 0.1428153217  | -1.0528228888 |
| F | 3.5300621965  | -0.1428153217 | -1.0528228888 |
| F | -0.7782872958 | 0.92320231    | 3.4934219772  |
| F | 0.7782872958  | -0.92320231   | 3.4934219772  |
| F | -3.4278153477 | 1.0683419058  | 3.483127393   |
| F | 3.4278153477  | -1.0683419058 | 3.483127393   |
| F | -4.7983810876 | 0.6504596627  | 1.1878470282  |
| F | 4.7983810876  | -0.6504596627 | 1.1878470282  |
| F | -1.1449667368 | -0.7229138468 | -4.7565665187 |
| F | 1.1449667368  | 0.7229138468  | -4.7565665187 |
| F | -2.3346526094 | -1.3638543393 | -2.4724510954 |
| F | 2.3346526094  | 1.3638543393  | -2.4724510954 |

**B-Me structure (D3)**

|   |          |          |          |
|---|----------|----------|----------|
| C | 0.62685  | 1.13959  | -0.61292 |
| C | 0.802    | -1.12297 | 0.40436  |
| C | -0.65329 | -1.12789 | 0.60767  |
| C | -0.77775 | 1.13737  | -0.41081 |
| C | 1.43503  | 0.08686  | 0.01722  |
| C | -1.43341 | -0.11319 | -0.00542 |
| C | 1.17966  | 2.12428  | -1.46867 |
| C | 1.59763  | -2.29013 | 0.51556  |
| C | -1.30994 | -2.06604 | 1.44222  |
| C | -1.4771  | 2.36198  | -0.54712 |
| C | 2.81011  | 0.25037  | 0.31694  |
| C | -2.80148 | -0.37978 | -0.25948 |
| C | 0.41051  | 3.24285  | -1.77438 |
| C | 2.97851  | -2.14408 | 0.60542  |
| C | -2.69236 | -2.18834 | 1.34116  |
| C | -0.85207 | 3.41016  | -1.21552 |
| C | 3.55827  | -0.8801  | 0.63058  |
| C | -3.405   | -1.43921 | 0.41089  |
| H | 0.82594  | 4.00392  | -2.42912 |
| H | 3.59699  | -3.03319 | 0.69198  |
| H | -3.20473 | -2.90575 | 1.97622  |
| H | -1.38046 | 4.35309  | -1.32595 |
| H | 4.61376  | -0.76503 | 0.86128  |
| H | -4.45396 | -1.65129 | 0.2232   |
| C | 2.48867  | 1.96764  | -2.20932 |
| C | 1.06387  | -3.69812 | 0.37745  |
| C | -0.63288 | -2.83187 | 2.55646  |
| C | -2.7946  | 2.66723  | 0.1293   |
| C | 3.48911  | 1.59111  | 0.48379  |
| C | -3.61322 | 0.30346  | -1.33683 |
| H | 2.28766  | 2.08505  | -3.27863 |
| H | 2.94007  | 0.98699  | -2.05987 |
| H | 3.21872  | 2.73294  | -1.93159 |
| H | 1.61235  | -4.18901 | -0.43238 |
| H | 0.00388  | -3.72166 | 0.12529  |
| H | 1.22029  | -4.29359 | 1.28114  |
| H | -1.16423 | -2.61311 | 3.48783  |
| H | 0.40925  | -2.54273 | 2.69058  |
| H | -0.67743 | -3.91396 | 2.40528  |
| H | -2.65919 | 3.56279  | 0.74347  |
| H | -3.12691 | 1.86088  | 0.78284  |
| H | -3.59077 | 2.88453  | -0.58812 |
| H | 3.93302  | 1.62237  | 1.48358  |
| H | 2.79391  | 2.42625  | 0.40073  |
| H | 4.29994  | 1.73992  | -0.23469 |
| H | -4.00794 | -0.46948 | -2.00343 |
| H | -3.01769 | 0.99074  | -1.93751 |
| H | -4.46992 | 0.84835  | -0.93071 |

**B-Me structure (C2)**

|   |               |               |               |
|---|---------------|---------------|---------------|
| C | -0.7279429689 | 0.107781859   | 1.2789984605  |
| C | 0.7279429689  | -0.107781859  | 1.2789984605  |
| C | -1.4317883992 | -0.168545459  | 0.0726932177  |
| C | 1.4317883992  | 0.168545459   | 0.0726932177  |
| C | -0.6290725354 | -0.3325858668 | -1.1590483525 |
| C | 0.6290725354  | 0.3325858668  | -1.1590483525 |
| C | -2.8273507458 | 0.0572355673  | 0.0195796945  |
| C | 2.8273507458  | -0.0572355673 | 0.0195796945  |
| C | -1.3922429916 | 0.6588381514  | 2.3879271859  |
| C | 1.3922429916  | -0.6588381514 | 2.3879271859  |
| C | -2.7824319397 | 0.7541036449  | 2.3473951578  |
| C | 2.7824319397  | -0.7541036449 | 2.3473951578  |
| C | -3.4811360868 | 0.4410537433  | 1.1938912054  |
| C | 3.4811360868  | -0.4410537433 | 1.1938912054  |
| C | -0.48175707   | -0.5019363111 | -3.5525753201 |
| C | 0.48175707    | 0.5019363111  | -3.5525753201 |
| C | -1.0725634635 | -0.9182766167 | -2.356655958  |
| C | 1.0725634635  | 0.9182766167  | -2.356655958  |
| C | -3.6766226387 | 0.0819215994  | -1.2299899521 |
| C | 3.6766226387  | -0.0819215994 | -1.2299899521 |
| C | -0.6992287757 | 1.2926439081  | 3.5710194685  |
| C | 0.6992287757  | -1.2926439081 | 3.5710194685  |
| C | -2.0528123909 | -2.065011523  | -2.3788426055 |
| C | 2.0528123909  | 2.065011523   | -2.3788426055 |
| H | -3.3104508774 | 1.1557942063  | 3.2078156764  |
| H | 3.3104508774  | -1.1557942063 | 3.2078156764  |
| H | -4.5558026805 | 0.5954372627  | 1.1623758484  |
| H | 4.5558026805  | -0.5954372627 | 1.1623758484  |
| H | -0.8242042792 | -0.9338491084 | -4.4888883805 |
| H | 0.8242042792  | 0.9338491084  | -4.4888883805 |
| H | -4.480525767  | 0.8091576938  | -1.0953734306 |
| H | 4.480525767   | -0.8091576938 | -1.0953734306 |
| H | -3.1003562705 | 0.3737780644  | -2.1095411816 |
| H | 3.1003562705  | -0.3737780644 | -2.1095411816 |
| H | -4.1447331573 | -0.8836118815 | -1.439130056  |
| H | 4.1447331573  | 0.8836118815  | -1.439130056  |
| H | -1.1204756393 | 2.2897836979  | 3.7291727691  |
| H | 1.1204756393  | -2.2897836979 | 3.7291727691  |
| H | 0.3743698002  | 1.400502372   | 3.4169318318  |
| H | -0.3743698002 | -1.400502372  | 3.4169318318  |
| H | -0.8612585565 | 0.7233722441  | 4.4911406776  |
| H | 0.8612585565  | -0.7233722441 | 4.4911406776  |
| H | -2.4348239518 | -2.2899608004 | -1.3820423583 |
| H | 2.4348239518  | 2.2899608004  | -1.3820423583 |
| H | -1.5290508249 | -2.9562585273 | -2.7401280875 |
| H | 1.5290508249  | 2.9562585273  | -2.7401280875 |
| H | -2.8960447507 | -1.8844834295 | -3.0514255024 |
| H | 2.8960447507  | 1.8844834295  | -3.0514255024 |

Triphenylene (FLAT – contrary to the reviewer)

|   |               |               |    |
|---|---------------|---------------|----|
| C | 0.7052965476  | 1.2524745332  | 0. |
| C | 0.7320264896  | -1.237041994  | 0. |
| C | -0.7320264896 | -1.237041994  | 0. |
| C | -0.7052965476 | 1.2524745332  | 0. |
| C | 1.4373230372  | -0.0154325392 | 0. |
| C | -1.4373230372 | -0.0154325392 | 0. |
| C | 1.3818129613  | 2.4874419588  | 0. |
| C | 1.4632814461  | -2.4404061071 | 0. |
| C | -1.4632814461 | -2.4404061071 | 0. |
| C | -1.3818129613 | 2.4874419588  | 0. |
| C | 2.8450944074  | -0.0470358516 | 0. |
| C | -2.8450944074 | -0.0470358516 | 0. |
| C | 0.7004183151  | 3.6890079476  | 0. |
| C | 2.8445654399  | -2.451084028  | 0. |
| C | -2.8445654399 | -2.451084028  | 0. |
| C | -0.7004183151 | 3.6890079476  | 0. |
| C | 3.544983755   | -1.2379239197 | 0. |
| C | -3.544983755  | -1.2379239197 | 0. |
| H | 1.2499818903  | 4.623988887   | 0. |
| H | 3.3795008978  | -3.3945105148 | 0. |
| H | -3.3795008978 | -3.3945105148 | 0. |
| H | -1.2499818903 | 4.623988887   | 0. |
| H | 4.6294827881  | -1.2294783722 | 0. |
| H | -4.6294827881 | -1.2294783722 | 0. |
| H | 2.4627307787  | 2.5151049429  | 0. |
| H | 0.9467793843  | -3.3903398885 | 0. |
| H | -0.9467793843 | -3.3903398885 | 0. |
| H | -2.4627307787 | 2.5151049429  | 0. |
| H | 3.409510163   | 0.8752349456  | 0. |
| H | -3.409510163  | 0.8752349456  | 0. |

C-Me structure (C2)

|   |               |               |               |
|---|---------------|---------------|---------------|
| C | -0.2319139844 | -0.6926087307 | 1.2911088471  |
| C | 0.2184153193  | 1.4377395135  | 0.0462345849  |
| C | -0.0638377174 | 0.7252692299  | -1.2068935356 |
| C | -0.2184153193 | -1.4377395135 | 0.0462345849  |
| C | 0.2319139844  | 0.6926087307  | 1.2911088471  |
| C | 0.0638377174  | -0.7252692299 | -1.2068935356 |
| S | -1.2826173345 | -2.952686705  | 1.8081364183  |
| S | 1.2826173345  | 2.952686705   | 1.8081364183  |
| S | 0.            | 0.            | -3.6542286653 |
| C | -0.8110099468 | -1.3837737788 | 2.3268214986  |
| C | 0.7806784014  | 2.687686979   | 0.1845793098  |
| C | -0.2408593714 | 1.2339662294  | -2.4709683215 |
| C | -0.7806784014 | -2.687686979  | 0.1845793098  |
| C | 0.8110099468  | 1.3837737788  | 2.3268214986  |
| C | 0.2408593714  | -1.2339662294 | -2.4709683215 |
| C | -1.2311532842 | -0.9164221535 | 3.6889238292  |
| C | 1.1972376321  | 3.7004590229  | -0.83975756   |
| C | -0.7413975881 | 2.577761129   | -2.9156525128 |
| C | -1.1972376321 | -3.7004590229 | -0.83975756   |
| C | 1.2311532842  | 0.9164221535  | 3.6889238292  |
| C | 0.7413975881  | -2.577761129  | -2.9156525128 |
| H | -2.1908298281 | -1.364912479  | 3.9611040979  |
| H | 2.0217592149  | 4.3069674917  | -0.4558725385 |
| H | -1.5646608642 | 2.4442292534  | -3.6241544052 |
| H | -2.0217592149 | -4.3069674917 | -0.4558725386 |
| H | 2.1908298281  | 1.364912479   | 3.9611040979  |
| H | 1.5646608642  | -2.4442292534 | -3.6241544052 |
| H | -1.3564764762 | 0.1693376495  | 3.6783520828  |
| H | 1.5467938722  | 3.1853440979  | -1.7392054755 |
| H | 0.0213297275  | 3.1901746837  | -3.4062037844 |
| H | -1.5467938722 | -3.1853440979 | -1.7392054755 |
| H | 1.3564764762  | -0.1693376495 | 3.6783520828  |
| H | -0.0213297275 | -3.1901746837 | -3.4062037844 |
| H | -0.5108221645 | -1.1694588262 | 4.4728755682  |
| H | 0.3914669223  | 4.3813860999  | -1.1281136036 |
| H | -1.1300147803 | 3.1274690149  | -2.0567476417 |
| H | -0.3914669223 | -4.3813860999 | -1.1281136036 |
| H | 0.5108221645  | 1.1694588262  | 4.4728755682  |
| H | 1.1300147803  | -3.1274690149 | -2.0567476417 |

C-Me structure (D3):

|   |               |               |               |
|---|---------------|---------------|---------------|
| C | 1.2580090366  | -0.730520385  | -0.0480720973 |
| C | 0.0036446931  | 1.4547279764  | -0.0480720973 |
| C | -1.2616537297 | 0.7242075914  | 0.0480720973  |
| C | 0.0036446931  | -1.4547279764 | 0.0480720973  |
| C | 1.2580090366  | 0.730520385   | 0.0480720973  |
| C | -1.2616537297 | -0.7242075914 | -0.0480720973 |
| S | 1.8541056479  | -3.2114051848 | 0.            |
| S | 1.8541056479  | 3.2114051848  | 0.            |
| S | -3.7082112958 | 0.            | 0.            |
| C | 2.335765023   | -1.5740091538 | -0.2166643882 |
| C | 0.1952494015  | 2.809836424   | -0.2166643882 |
| C | -2.5310144244 | 1.2358272703  | 0.2166643882  |
| C | 0.1952494015  | -2.809836424  | 0.2166643882  |
| C | 2.335765023   | 1.5740091538  | 0.2166643882  |
| C | -2.5310144244 | -1.2358272703 | -0.2166643882 |
| C | 3.7243569517  | -1.3157886312 | -0.7284229215 |
| C | -0.7226720952 | 3.8832820485  | -0.7284229215 |
| C | -3.0016848565 | 2.5674934174  | 0.7284229215  |
| C | -0.7226720952 | -3.8832820485 | 0.7284229215  |
| C | 3.7243569517  | 1.3157886312  | 0.7284229215  |
| C | -3.0016848565 | -2.5674934174 | -0.7284229215 |
| H | 4.0128814618  | -2.1188992669 | -1.4124041072 |
| H | -0.1714201378 | 4.5347069218  | -1.4124041072 |
| H | -3.8414613241 | 2.4158076549  | 1.4124041072  |
| H | -0.1714201378 | -4.5347069218 | 1.4124041072  |
| H | 4.0128814618  | 2.1188992669  | 1.4124041072  |
| H | -3.8414613241 | -2.4158076549 | -1.4124041072 |
| H | 3.7428640519  | -0.3794645105 | -1.2891774511 |
| H | -1.54280612   | 3.4311476071  | -1.2891774511 |
| H | -2.2000579319 | 3.0516830966  | 1.2891774511  |
| H | -1.54280612   | -3.4311476071 | 1.2891774511  |
| H | 3.7428640519  | 0.3794645105  | 1.2891774511  |
| H | -2.2000579319 | -3.0516830966 | -1.2891774511 |
| H | 4.4827424183  | -1.2644093623 | 0.0578827905  |
| H | -1.1463605806 | 4.514373494   | 0.0578827905  |
| H | -3.3363818377 | 3.2499641317  | -0.0578827905 |
| H | -1.1463605806 | -4.514373494  | -0.0578827905 |
| H | 4.4827424183  | 1.2644093623  | -0.0578827905 |
| H | -3.3363818377 | -3.2499641317 | 0.0578827905  |

C2 to C2 TS

|   |          |          |          |
|---|----------|----------|----------|
| C | -1.27982 | 0.08622  | 0.72165  |
| C | 1.22841  | -0.22787 | 0.74547  |
| C | 1.22727  | -0.23315 | -0.74199 |
| C | -1.27946 | 0.08896  | -0.71984 |
| C | -0.00176 | 0.17895  | 1.42109  |
| C | -0.00042 | 0.17731  | -1.41865 |
| S | -3.65771 | -0.47576 | -0.00013 |
| S | 1.80146  | 0.24334  | 3.20319  |
| S | 1.80021  | 0.21519  | -3.20306 |
| C | -2.5072  | -0.23305 | 1.25543  |
| C | 2.27622  | -0.30208 | 1.64007  |
| C | 2.27241  | -0.32594 | -1.63877 |
| C | -2.50711 | -0.22809 | -1.25475 |
| C | 0.18437  | 0.55351  | 2.72828  |
| C | 0.187    | 0.54209  | -2.72911 |
| C | -2.90382 | -0.5848  | 2.65812  |
| C | 3.7211   | -0.7092  | 1.54509  |
| C | 3.70289  | -0.78269 | -1.54896 |
| C | -2.90489 | -0.57531 | -2.65824 |
| C | -0.73103 | 1.2951   | 3.65749  |
| C | -0.72212 | 1.29019  | -3.65951 |
| H | -3.69333 | -1.34097 | 2.64776  |
| H | 4.34853  | 0.09518  | 1.15255  |
| H | 4.31461  | -0.11656 | -0.94011 |
| H | -3.69971 | -1.3259  | -2.6495  |
| H | -0.1896  | 2.12195  | 4.12654  |
| H | -0.17436 | 2.11375  | -4.12708 |
| H | -2.04096 | -1.0019  | 3.1848   |
| H | 3.85475  | -1.59531 | 0.92706  |
| H | 3.77651  | -1.79467 | -1.14598 |
| H | -2.04455 | -0.99779 | -3.18483 |
| H | -1.56322 | 1.71769  | 3.09055  |
| H | -1.55221 | 1.71835  | -3.09376 |
| H | -3.27066 | 0.27148  | 3.23176  |
| H | 4.09601  | -0.95096 | 2.54375  |
| H | 4.14296  | -0.80241 | -2.54967 |
| H | -3.26521 | 0.28416  | -3.23118 |
| H | -1.13919 | 0.66958  | 4.45703  |
| H | -1.13324 | 0.66801  | -4.46014 |



### B3PW91/DZ(2d,p) Structures:

C-Me-C<sub>1</sub>:

|   |           |           |           |
|---|-----------|-----------|-----------|
| C | 0.004602  | 1.440540  | 0.190791  |
| C | -1.186070 | -0.710614 | -0.267193 |
| C | 0.083494  | -1.438460 | -0.188472 |
| C | 1.268197  | 0.762965  | -0.035197 |
| C | -1.222650 | 0.643724  | 0.271689  |
| C | 1.307891  | -0.692462 | 0.039252  |
| S | 1.718642  | 3.242891  | -0.411875 |
| S | -3.653957 | -0.097264 | -0.001254 |
| S | 1.895861  | -3.144402 | 0.408081  |
| C | 0.107495  | 2.808988  | 0.007382  |
| C | -2.443671 | -1.176495 | -0.596339 |
| C | 0.263053  | -2.799631 | -0.009802 |
| C | 2.284413  | 1.619803  | -0.406660 |
| C | -2.503524 | 1.043049  | 0.598193  |
| C | 2.370226  | -1.492371 | 0.408419  |
| C | -0.927415 | 3.887633  | -0.075318 |
| C | -2.877478 | -2.321407 | -1.462329 |
| C | -0.708943 | -3.935678 | 0.067883  |
| C | 3.655558  | 1.344037  | -0.943081 |
| C | -2.995652 | 2.160334  | 1.468726  |
| C | 3.724163  | -1.142003 | 0.944991  |
| H | -0.555874 | 4.726877  | -0.672032 |
| H | -3.633705 | -1.977033 | -2.177299 |
| H | -0.278920 | -4.766670 | 0.636096  |
| H | 3.917250  | 2.077095  | -1.713543 |
| H | -3.688344 | 1.764061  | 2.220383  |
| H | 4.025192  | -1.859341 | 1.715899  |
| H | -1.828715 | 3.505035  | -0.564394 |
| H | -2.032199 | -2.698353 | -2.041690 |
| H | -0.999469 | -4.327508 | -0.912874 |
| H | 3.682121  | 0.353083  | -1.404731 |
| H | -2.162107 | 2.616228  | 2.005930  |
| H | 3.696496  | -0.150921 | 1.406221  |
| H | -1.218955 | 4.287311  | 0.902282  |
| H | -3.315663 | -3.157554 | -0.905528 |
| H | -1.618957 | -3.615460 | 0.585255  |
| H | 4.439111  | 1.381762  | -0.177617 |
| H | -3.526956 | 2.947360  | 0.921075  |
| H | 4.508831  | -1.137264 | 0.179727  |

C-Me-C<sub>2</sub> (the one that is essentially the energy of C<sub>1</sub>):

|   |               |               |               |
|---|---------------|---------------|---------------|
| C | 0.1485561015  | -0.7135929126 | 1.2891154304  |
| C | -0.0355273305 | 1.4516727302  | 0.0442018657  |
| C | 0.1614932089  | 0.7108590582  | -1.2046263676 |
| C | 0.0355273305  | -1.4516727302 | 0.0442018657  |
| C | -0.1485561015 | 0.7135929126  | 1.2891154304  |
| C | -0.1614932089 | -0.7108590582 | -1.2046263676 |
| S | 0.8984361196  | -3.0935842815 | 1.8074385168  |
| S | -0.8984361196 | 3.0935842815  | 1.8074385168  |
| S | 0.            | 0.            | -3.6550293467 |
| C | 0.6416757162  | -1.4758330061 | 2.3285176464  |
| C | -0.4260817737 | 2.7724753373  | 0.1847637696  |
| C | 0.4187271798  | 1.1890634294  | -2.4742643043 |
| C | 0.4260817737  | -2.7724753373 | 0.1847637696  |
| C | -0.6416757162 | 1.4758330061  | 2.3285176464  |
| C | -0.4187271798 | -1.1890634294 | -2.4742643043 |
| C | 1.122040449   | -1.0857345523 | 3.6928419009  |
| C | -0.6787188939 | 3.8529330009  | -0.8203367825 |
| C | 1.1017354544  | 2.4409546033  | -2.9374855256 |
| C | 0.6787188939  | -3.8529330009 | -0.8203367825 |
| C | -1.122040449  | 1.0857345523  | 3.6928419009  |
| C | -1.1017354544 | -2.4409546033 | -2.9374855256 |
| H | 1.9910719019  | -1.6887468141 | 3.9767710075  |
| H | -1.3848795305 | 4.5875049509  | -0.4201980009 |
| H | 1.886128194   | 2.1869627487  | -3.6598749693 |
| H | 1.3848795305  | -4.5875049509 | -0.4201980009 |
| H | -1.9910719019 | 1.6887468141  | 3.9767710075  |
| H | -1.886128194  | -2.1869627487 | -3.6598749693 |
| H | 1.431378744   | -0.0367970442 | 3.6937473287  |
| H | -1.1209269547 | 3.4259127191  | -1.7259922157 |
| H | 1.5861821344  | 2.9407467041  | -2.0964881105 |
| H | 1.1209269547  | -3.4259127191 | -1.7259922157 |
| H | -1.431378744  | 0.0367970442  | 3.6937473287  |
| H | -1.5861821344 | -2.9407467041 | -2.0964881105 |
| H | 0.3653332758  | -1.2159157805 | 4.4750121767  |
| H | 0.2265270815  | 4.3966747063  | -1.1119571592 |
| H | 0.4311623222  | 3.1571360688  | -3.4261673497 |
| H | -0.2265270815 | -4.3966747063 | -1.1119571592 |
| H | -0.3653332758 | 1.2159157805  | 4.4750121767  |
| H | -0.4311623222 | -3.1571360688 | -3.4261673497 |

C-Me-TS structure:

|   |               |               |               |
|---|---------------|---------------|---------------|
| C | -0.2309007661 | 0.6853455136  | 1.2422212987  |
| C | -0.1398174361 | 0.7233983616  | -1.2930372393 |
| C | 0.1398174361  | -0.7233983616 | -1.2930372393 |
| C | 0.2309007661  | -0.6853455136 | 1.2422212987  |
| C | -0.2391808984 | 1.4214465215  | -0.0158665825 |
| C | 0.2391808984  | -1.4214465215 | -0.0158665825 |
| S | 0.            | 0.            | 3.6918051384  |
| S | -0.3842022293 | 3.2224894157  | -1.8083540029 |
| S | 0.3842022293  | -3.2224894157 | -1.8083540029 |
| C | -0.54221791   | 1.1364048281  | 2.5147112281  |
| C | -0.3132364629 | 1.5976755786  | -2.3588667743 |
| C | 0.3132364629  | -1.5976755786 | -2.3588667743 |
| C | 0.54221791    | -1.1364048281 | 2.5147112281  |
| C | -0.2597095729 | 2.8007782821  | -0.1544148083 |
| C | 0.2597095729  | -2.8007782821 | -0.1544148083 |
| C | 1.3917548108  | -2.2786135639 | 2.9865468677  |
| C | -0.5552859062 | 1.4335027487  | -3.8322895382 |
| C | 0.5552859062  | -1.4335027487 | -3.8322895382 |
| C | -1.3917548108 | 2.2786135639  | 2.9865468677  |
| C | -0.0043069447 | 3.9055460383  | 0.8261935956  |
| C | 0.0043069447  | -3.9055460383 | 0.8261935956  |
| H | 2.0746407152  | -1.9284028376 | 3.7686567504  |
| H | -0.9224951249 | 2.376978099   | -4.2488693683 |
| H | 0.9224951249  | -2.376978099  | -4.2488693683 |
| H | -2.0746407152 | 1.9284028376  | 3.7686567504  |
| H | 0.5663908398  | 4.7049581209  | 0.341445082   |
| H | -0.5663908398 | -4.7049581209 | 0.341445082   |
| H | 2.0037446913  | -2.6585825695 | 2.1657905714  |
| H | 0.3417669914  | 1.1647563499  | -4.3956923092 |
| H | -0.3417669914 | -1.1647563499 | -4.3956923092 |
| H | -2.0037446913 | 2.6585825695  | 2.1657905714  |
| H | -0.9152936036 | 4.3595562904  | 1.231645586   |
| H | 0.9152936036  | -4.3595562904 | 1.231645586   |
| H | 0.8215188736  | -3.1153058501 | 3.4060983372  |
| H | -1.3238852411 | 0.6801356123  | -4.0250874399 |
| H | 1.3238852411  | -0.6801356123 | -4.0250874399 |
| H | -0.8215188736 | 3.1153058501  | 3.4060983372  |
| H | 0.5924141782  | 3.5358486017  | 1.6640474446  |
| H | -0.5924141782 | -3.5358486017 | 1.6640474446  |

imaginary mode to move the methyl/methyl class is -40.1 cm-1

C-Me- $D_3$  structure:

|   |           |           |           |
|---|-----------|-----------|-----------|
| C | 0.725004  | 1.259994  | 0.049091  |
| C | 0.728684  | -1.257869 | 0.049091  |
| C | -0.728684 | -1.257869 | -0.049091 |
| C | -0.725004 | 1.259994  | -0.049091 |
| C | 1.453688  | -0.002125 | -0.049091 |
| C | -1.453688 | -0.002125 | 0.049091  |
| S | 0.000000  | 3.709748  | 0.000000  |
| S | 3.212736  | -1.854874 | 0.000000  |
| S | -3.212736 | -1.854874 | 0.000000  |
| C | 1.237613  | 2.536334  | 0.223368  |
| C | 1.577723  | -2.339971 | 0.223368  |
| C | -1.577723 | -2.339971 | -0.223368 |
| C | -1.237613 | 2.536334  | -0.223368 |
| C | 2.815336  | -0.196362 | -0.223368 |
| C | -2.815336 | -0.196362 | 0.223368  |
| C | 2.561987  | 3.026323  | 0.728890  |
| C | 1.339879  | -3.731908 | 0.728890  |
| C | -1.339879 | -3.731908 | -0.728890 |
| C | -2.561987 | 3.026323  | -0.728890 |
| C | 3.901867  | 0.705584  | -0.728890 |
| C | -3.901867 | 0.705584  | 0.728890  |
| H | 2.408010  | 3.895439  | 1.377548  |
| H | 2.169544  | -4.033117 | 1.377548  |
| H | -2.169544 | -4.033117 | -1.377548 |
| H | -2.408010 | 3.895439  | -1.377548 |
| H | 4.577554  | 0.137678  | -1.377548 |
| H | -4.577554 | 0.137678  | 1.377548  |
| H | 3.048634  | 2.253933  | 1.329048  |
| H | 0.427647  | -3.767161 | 1.329048  |
| H | -0.427647 | -3.767161 | -1.329048 |
| H | -3.048634 | 2.253933  | -1.329048 |
| H | 3.476280  | 1.513228  | -1.329048 |
| H | -3.476280 | 1.513228  | 1.329048  |
| H | 3.255179  | 3.333602  | -0.061947 |
| H | 1.259395  | -4.485868 | -0.061947 |
| H | -1.259395 | -4.485868 | 0.061947  |
| H | -3.255179 | 3.333602  | 0.061947  |
| H | 4.514573  | 1.152267  | 0.061947  |
| H | -4.514573 | 1.152267  | -0.061947 |

C-Me-C<sub>s</sub> structure (2 modes of -39.4 cm<sup>-1</sup>)

|   |           |           |           |
|---|-----------|-----------|-----------|
| C | -1.276342 | 0.075958  | 0.721229  |
| C | 1.228185  | -0.220356 | 0.741189  |
| C | 1.228185  | -0.220356 | -0.741189 |
| C | -1.276342 | 0.075958  | -0.721229 |
| C | -0.001501 | 0.187974  | 1.417742  |
| C | -0.001501 | 0.187974  | -1.417742 |
| S | -3.652629 | -0.509199 | 0.000000  |
| S | 1.805092  | 0.247728  | 3.201048  |
| S | 1.805092  | 0.247728  | -3.201048 |
| C | -2.507388 | -0.253586 | 1.258159  |
| C | 2.278839  | -0.309740 | 1.642415  |
| C | 2.278839  | -0.309740 | -1.642415 |
| C | -2.507388 | -0.253586 | -1.258159 |
| C | 0.189381  | 0.572812  | 2.728847  |
| C | 0.189381  | 0.572812  | -2.728847 |
| C | -2.920469 | -0.591176 | 2.657089  |
| C | 3.710693  | -0.755620 | 1.561489  |
| C | 3.710693  | -0.755620 | -1.561489 |
| C | -2.920469 | -0.591176 | -2.657089 |
| C | -0.708087 | 1.326514  | 3.662740  |
| C | -0.708087 | 1.326514  | -3.662740 |
| H | -3.723321 | -1.335665 | 2.648380  |
| H | 4.112163  | -0.887200 | 2.571541  |
| H | 4.112163  | -0.887200 | -2.571541 |
| H | -3.723321 | -1.335665 | -2.648380 |
| H | -0.154937 | 2.149572  | 4.129305  |
| H | -0.154937 | 2.149572  | -4.129305 |
| H | -2.073332 | -1.019395 | 3.201372  |
| H | 3.811959  | -1.715861 | 1.051179  |
| H | 3.811959  | -1.715861 | -1.051179 |
| H | -2.073332 | -1.019395 | -3.201372 |
| H | -1.541930 | 1.763129  | 3.108186  |
| H | -1.541930 | 1.763129  | -3.108186 |
| H | -3.282818 | 0.272985  | 3.225665  |
| H | 4.350929  | -0.025630 | 1.057855  |
| H | 4.350929  | -0.025630 | -1.057855 |
| H | -3.282818 | 0.272985  | -3.225665 |
| H | -1.119021 | 0.711327  | 4.471498  |
| H | -1.119021 | 0.711327  | -4.471498 |

C-Me-C<sub>2</sub> (the one that is essentially D<sub>3</sub>):

|   |               |               |               |
|---|---------------|---------------|---------------|
| C | 0.7250852605  | 1.2604489672  | 0.0490292178  |
| C | 0.7286559165  | -1.257270771  | 0.0489927846  |
| C | -0.7286559165 | -1.257270771  | -0.0489927846 |
| C | -0.7250852605 | 1.2604489672  | -0.0490292178 |
| C | 1.4538751489  | -0.0017429325 | -0.0491462725 |
| C | -1.4538751489 | -0.0017429325 | 0.0491462725  |
| S | 0.            | 3.7102328981  | 0.            |
| S | 3.2123682604  | -1.8553233254 | -0.0001179048 |
| S | -3.2123682604 | -1.8553233254 | 0.0001179048  |
| C | 1.2377776026  | 2.5368414282  | 0.222563889   |
| C | 1.5771846805  | -2.339775586  | 0.2227249877  |
| C | -1.5771846805 | -2.339775586  | -0.2227249877 |
| C | -1.2377776026 | 2.5368414282  | -0.222563889  |
| C | 2.8155295559  | -0.1965378118 | -0.2229656889 |
| C | -2.8155295559 | -0.1965378118 | 0.2229656889  |
| C | 2.5626235016  | 3.0266865757  | 0.727087117   |
| C | 1.3383817658  | -3.7318823433 | 0.7275734952  |
| C | -1.3383817658 | -3.7318823433 | -0.7275734952 |
| C | -2.5626235016 | 3.0266865757  | -0.727087117  |
| C | 3.9028455508  | 0.7050671239  | -0.7273158911 |
| C | -3.9028455508 | 0.7050671239  | 0.7273158911  |
| H | 2.4094079859  | 3.8950112542  | 1.3769680293  |
| H | 2.1690269239  | -4.0350938023 | 1.37402491    |
| H | -2.1690269239 | -4.0350938023 | -1.37402491   |
| H | -2.4094079859 | 3.8950112542  | -1.3769680293 |
| H | 4.5799392251  | 0.1366152332  | -1.3739908975 |
| H | -4.5799392251 | 0.1366152332  | 1.3739908975  |
| H | 3.0500772498  | 2.2536410916  | 1.3256328452  |
| H | 0.4275430324  | -3.7660849448 | 1.3298122888  |
| H | -0.4275430324 | -3.7660849448 | -1.3298122888 |
| H | -3.0500772498 | 2.2536410916  | -1.3256328452 |
| H | 3.4781920437  | 1.511944486   | -1.3290854747 |
| H | -3.4781920437 | 1.511944486   | 1.3290854747  |
| H | 3.2548573879  | 3.3347391842  | -0.0643399935 |
| H | 1.2546112613  | -4.485146076  | -0.0635883764 |
| H | -1.2546112613 | -4.485146076  | 0.0635883764  |
| H | -3.2548573879 | 3.3347391842  | 0.0643399935  |
| H | 4.5138311632  | 1.1527467997  | 0.0642694105  |
| H | -4.5138311632 | 1.1527467997  | -0.0642694105 |
